# Supplementary material
Source: PubMed Central journal article supplement (PMC7316593)
Supplement: NIHMS1553196-supplement-1.pdf [file NIHMS1553196-supplement-1.pdf]

Supplementary Figure S1

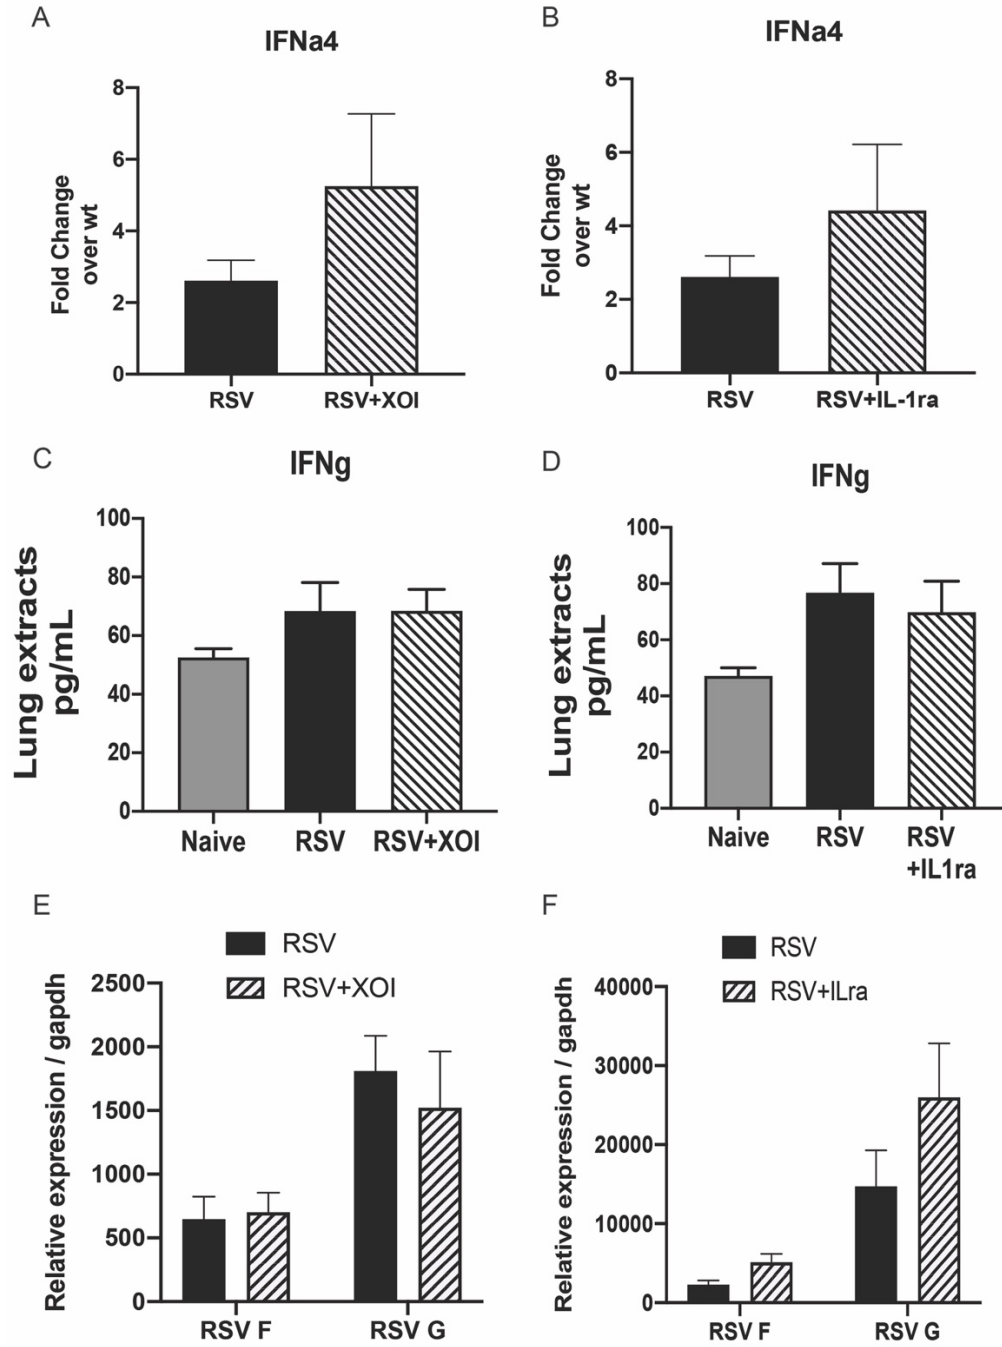

**Supplementary figure S1.** A and B) qPCR of total lung RNA IFN $\alpha$ 4 expression. C and D) Total lung extracts IFN $\gamma$  detection. E and F) RSV F and G expression.

Supplementary Figure S2

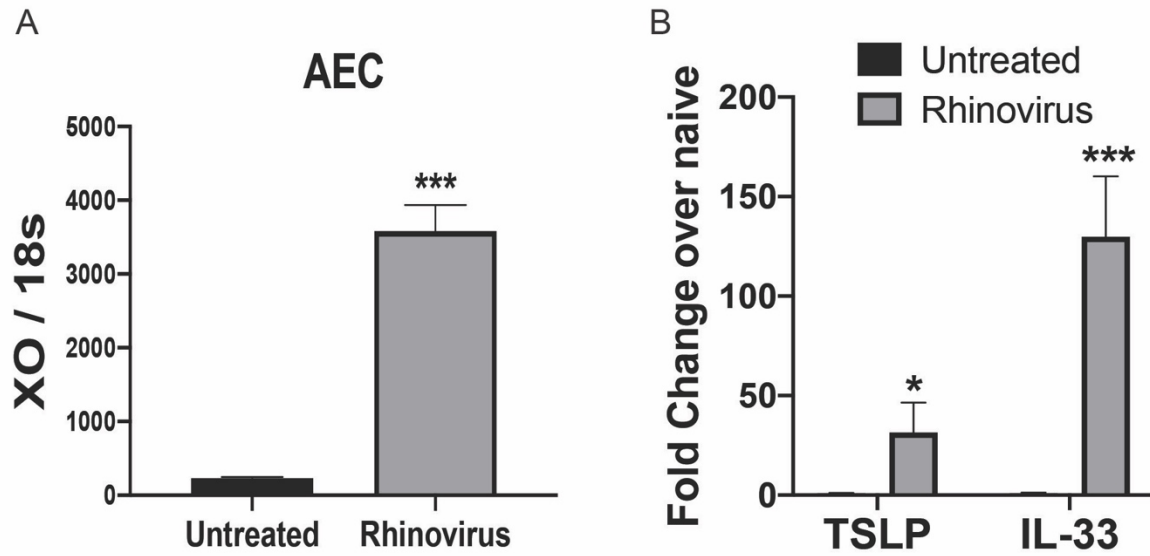

**Supplementary figure S2.** A) Primary mouse airway epithelial cells increase the expression of XO during Rhinovirus B) Rhinovirus infection induce inflammatory innate cytokines similar than RSV infection.

## Supplementary Figure S3

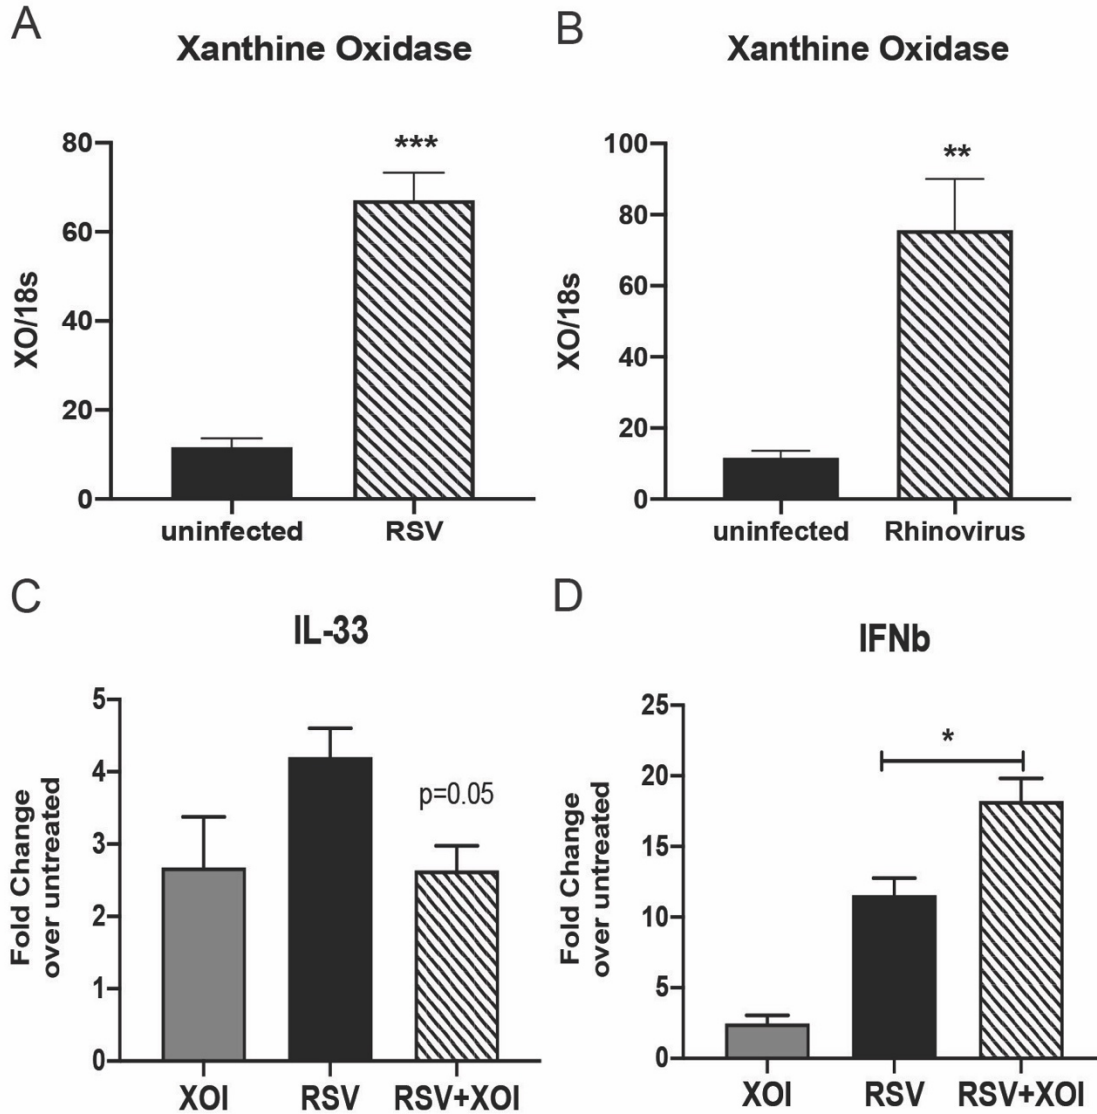

**Supplementary figure S3.** A) Primary human small epithelial cells (SAEC) RSV infected increased xanthine oxidase expression B) SAEC Rhinovirus infected increased xanthine oxidase expression C) IL-33 expression on SAEC RSV infected with or without xanthine oxidase inhibitor. D) IFN $\beta$  expression on SAEC RSV infected with or without xanthine oxidase inhibitor.
